# Supplementary material for: Deterioration mechanism of electrochromic poly(3,4-(2,2-dimethylpropylenedioxy)thiophene) thin films
Source: Royal Society of Chemistry journal article supplement (doi:10.1039/c6tc00930a), 2016-01-01
Supplement: c6tc00930a1.pdf [file c6tc00930a1.pdf]

**Electronic Supplementary Information**

**Deterioration Mechanism of Electrochromic poly (3,4-(2,2 dimethylpropylenedioxy)  
thiophene) Thin Films**

Shian Guan,<sup>a</sup> Ayman S. Elmezayyen,<sup>a</sup> Feifei Zhang,<sup>a</sup> Jianming Zheng<sup>a</sup> and Chunye Xu<sup>a,b</sup>

- a. Hefei National Laboratory for Physical Sciences at the Microscale, University of Science and Technology of China, Hefei, 230026, P. R. China.
- b. CAS Key Lab of Soft Matter Chemistry, Department of Polymer Science and Engineering, University of Science and Technology of China, Hefei, 230026, P. R. China.

---

\*Corresponding author

E-mail address: chunye@ustc.edu.cn.

Figure S1

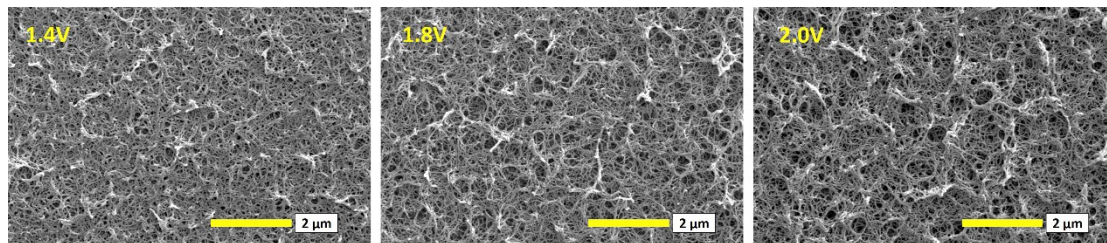

**Fig. S1.** SEM images of PProDot-Me<sub>2</sub> film under different polymerization voltage (1.4V, 1.8V and 2.0V) (vs. Ag/Ag<sup>+</sup>) with growth time for 4 s polymerized in 0.1 M LiClO<sub>4</sub>/PC electrolyte.

Figure S2

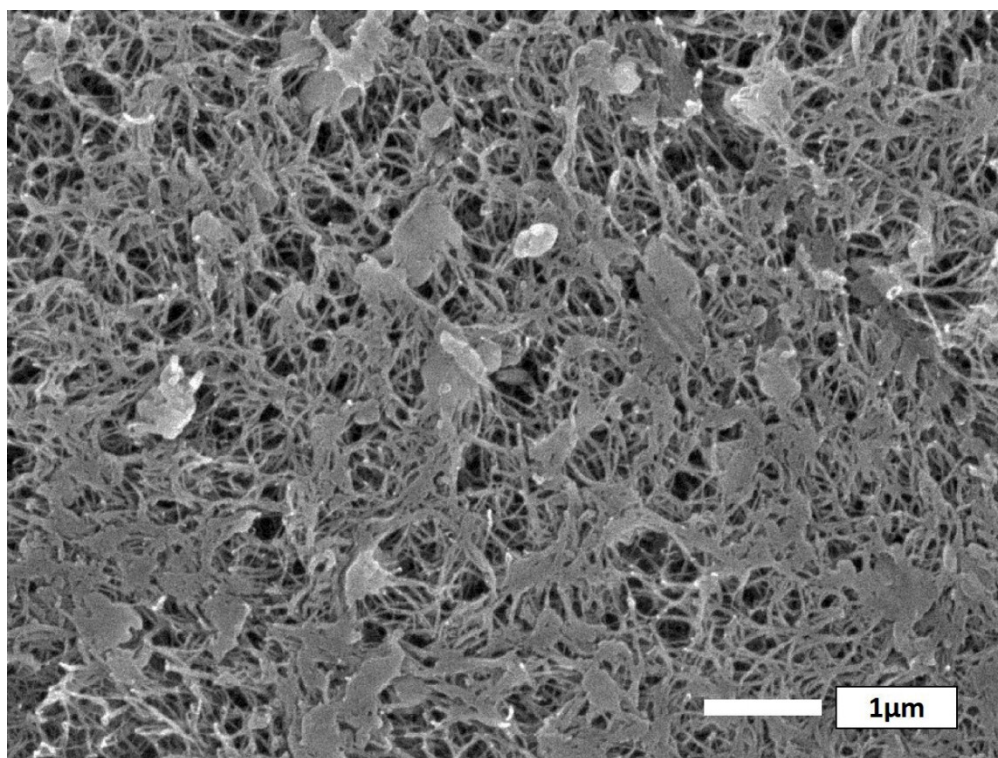

**Fig. S2.** SEM images of PProDot-Me<sub>2</sub> film with growth time for 20 s polymerized in 0.1M LiClO<sub>4</sub>/PC electrolyte at E<sub>g</sub>=1.65 V (vs. Ag/Ag<sup>+</sup>).

Figure S3

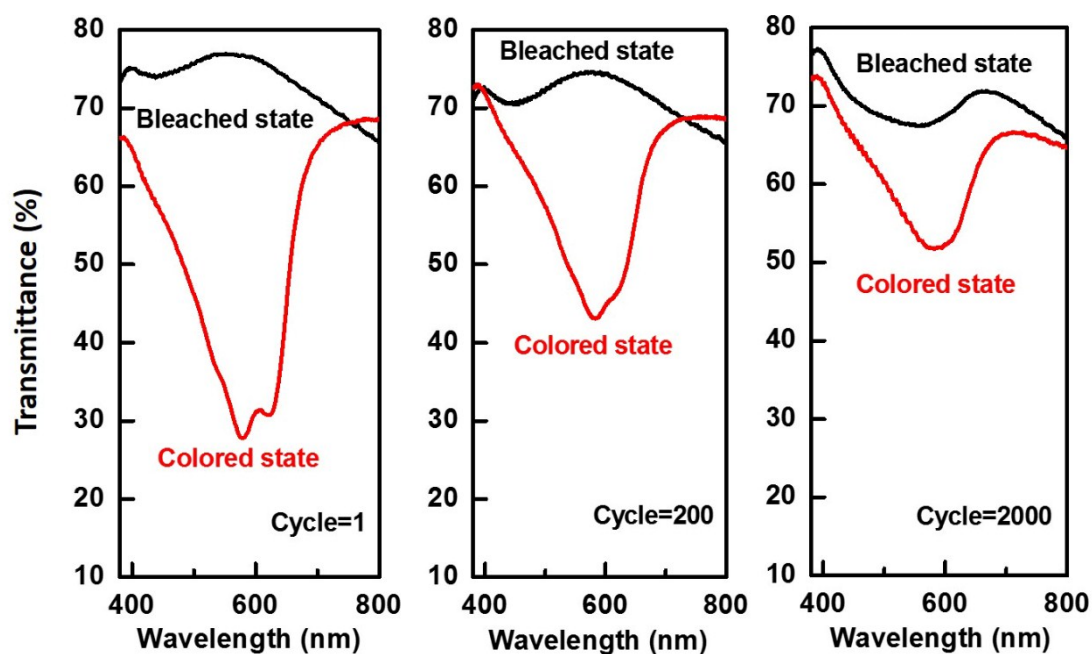

**Fig. S3.** Transmittances of PProDOT-Me<sub>2</sub> films with different cycles (cycle=1, 200, 2000) under the condition of  $\pm 1.2$ V within 3.0s in 0.1M LiClO<sub>4</sub>/PC electrolyte.

Figure S4

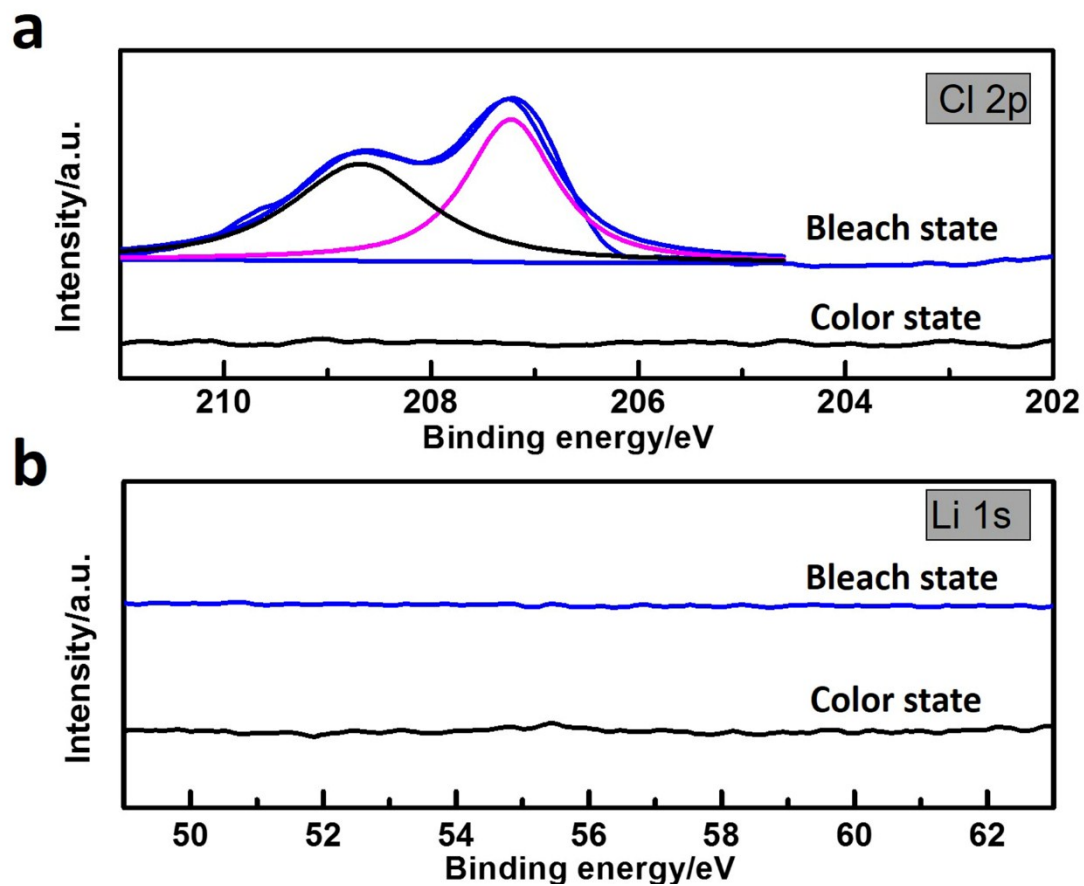

**Fig. S4.** Cl2p and Li1s spectra of PProDOT-Me<sub>2</sub> film after 40k cycles under the operating condition of  $\pm 0.3$  V (vs. Ag/Ag<sup>+</sup>) within 1.0 s in 0.0125 M LiClO<sub>4</sub>/PC electrolyte.

Figure S4

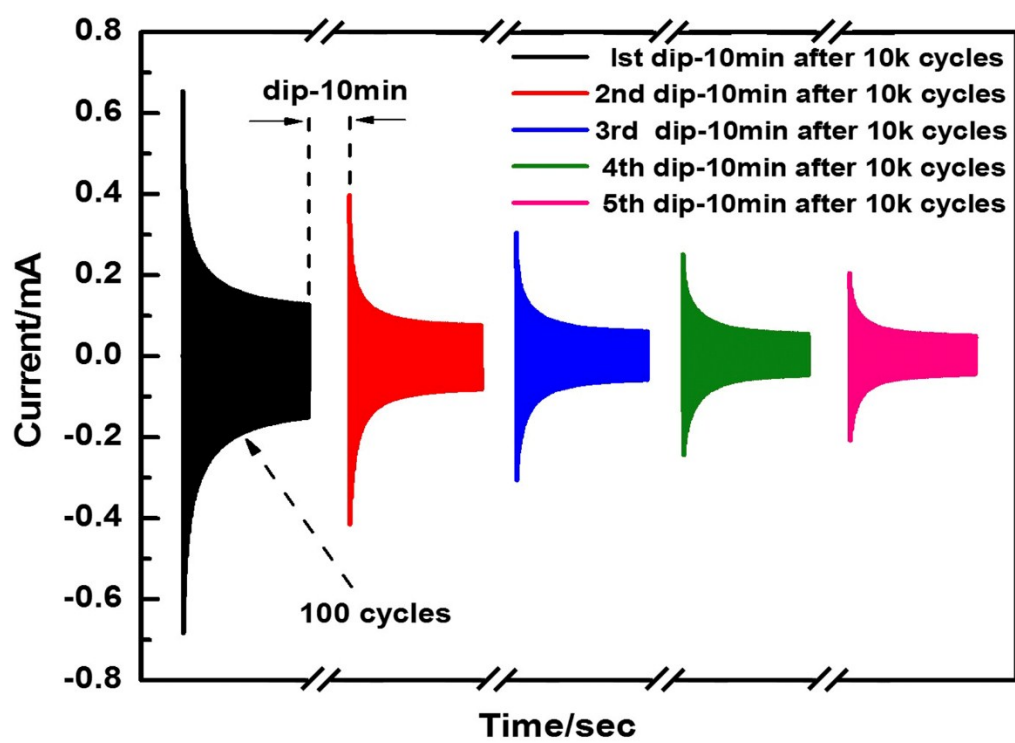

**Fig. S5.** Stability of the PProDOT-Me<sub>2</sub> film with 10k cycles after 5 times dip in pure PC solution.
